# Supplementary material for: ZnIn 2 S 4 nanosheets with tunable dual vacancies for efficient sacrificial-agent-free H 2 O 2 photosynthesis
Source: Royal Society of Chemistry journal article supplement (doi:10.1039/d4qi02030h), 2024-01-01
Supplement: d4qi02030h1.pdf [file d4qi02030h1.pdf]

## **ZnIn<sub>2</sub>S<sub>4</sub> nanosheets with tunable dual vacancies for efficient sacrificial-agent-free H<sub>2</sub>O<sub>2</sub> photosynthesis**

Chen Zhang, ‡<sup>a,d</sup> Gao Xu, ‡<sup>a</sup> Qifeng Liang, <sup>a</sup> Li Liang, <sup>a</sup> Zebo Fang, <sup>a</sup> Rong Wu, <sup>d</sup>  
Shunhang Wei, <sup>a,\*</sup> Lei Wang, <sup>c,\*</sup> Xiaoxiang Xu, <sup>b,\*</sup>

<sup>a</sup> Zhejiang Engineering Research Center of MEMS, Shaoxing University, Shaoxing 312000, China

<sup>b</sup> School of Chemical Science and Engineering, Tongji University, Shanghai, 200092, China

<sup>c</sup> School of Environmental Science and Engineering, Guangzhou University, Guangzhou, 510006, China

<sup>d</sup> School of Physics Science and Technology, Xinjiang University, Urumqi 830000, China

‡ These authors contribute equally

\*Corresponding authors. E-mail addresses: wsh@usx.edu.cn (S. Wei); lwang866@163.com (L. Wang); xxxu@tongji.edu.cn (X. Xu).

## Characterization

An X-ray powder diffractometer (XRD, Empyrean) and a Raman spectrometer (LabRAM HR Evolution) were used to detect the crystal structure of the obtained samples. A field emission scanning electron microscope (FESEM, SIGMA 300) and a high-resolution transmission electron microscope (HRTEM, JEM-2100F) equipped with an energy dispersive X-ray spectrometer (EDS) were used to observe their morphology and elemental distributions. The time-resolved PL (TRPL) decay spectra were recorded using a spectrofluorometer (FLUOROLOG-3-11) with an excitation wavelength of 370 nm (detection wavelength was 512 nm). The surface states of the samples were characterized by an X-ray photoelectron spectroscopy (XPS, Thermo Scientific K-Alpha+), and the binding energies calibrated to the C 1s peak at 284.8 eV. The UV-vis diffuse reflection spectra (DRS) of the samples were collected on an UV-vis spectrophotometer (Shimadzu UV-3600 plus) equipped with an integrating sphere assembly, and BaSO<sub>4</sub> was used as the non-absorbing reference material. Electron paramagnetic resonance (EPR) spectra were recorded on a Bruker EMXPLUS at room temperature. The composition of samples was explored using inductively coupled plasma optical emission spectrometry (ICP-OES, Optima 8300) and organic element analyzer (OEA, Elementar: Vario EL cube). The steady-state surface photovoltage (SPV) spectra were collected in a CEL-SPS1000

spectroscopic analysis system containing a 500 W Xenon lamp (CEL-S500).

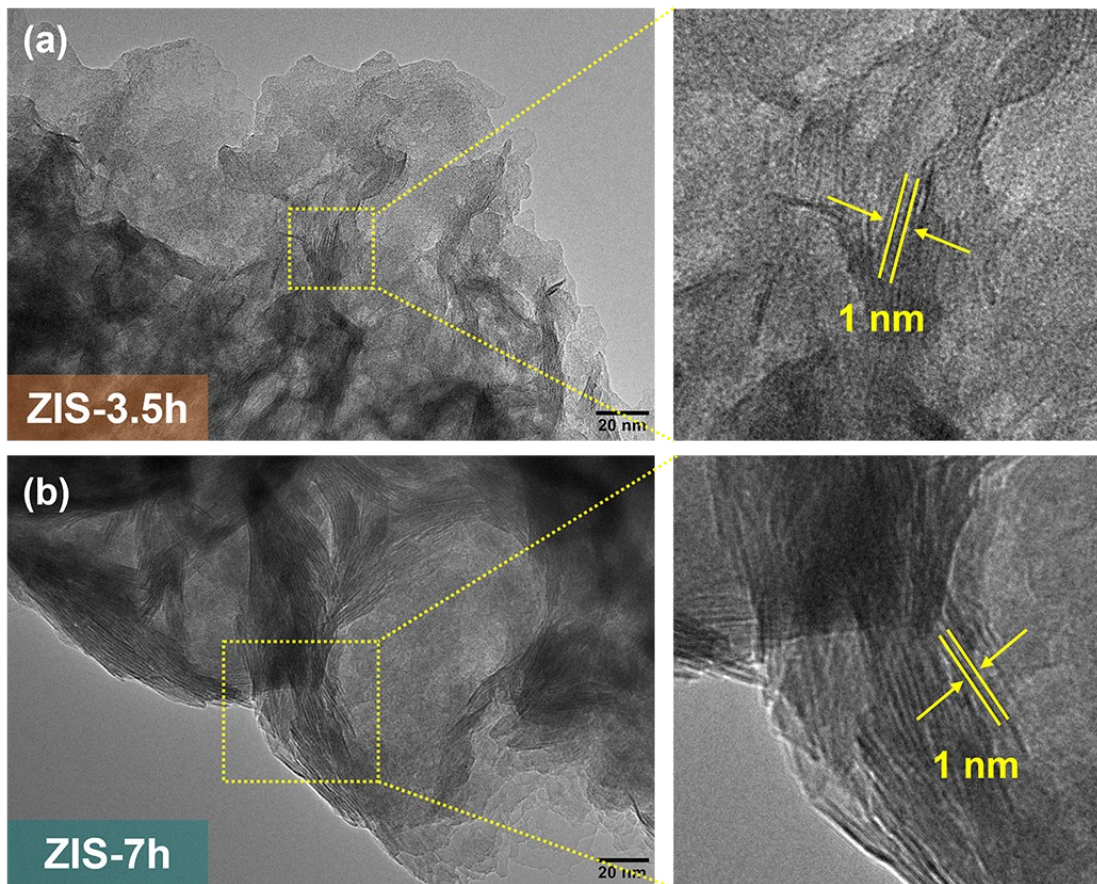

Fig. S1 TEM images of (a) ZIS-3.5h and (b) ZIS-7h.

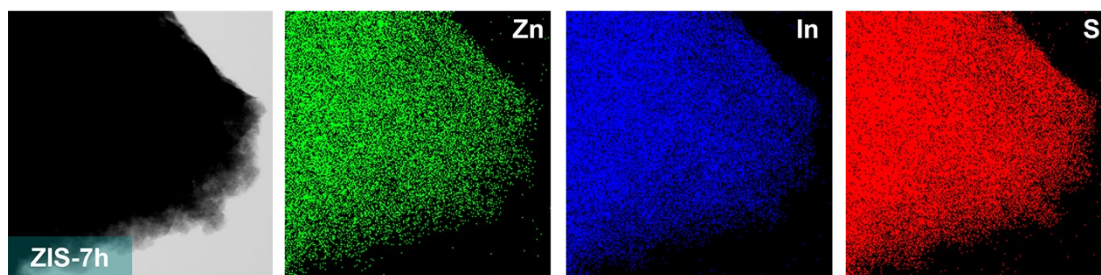

Fig. S2 the corresponding elemental mapping of the ZIS-7.

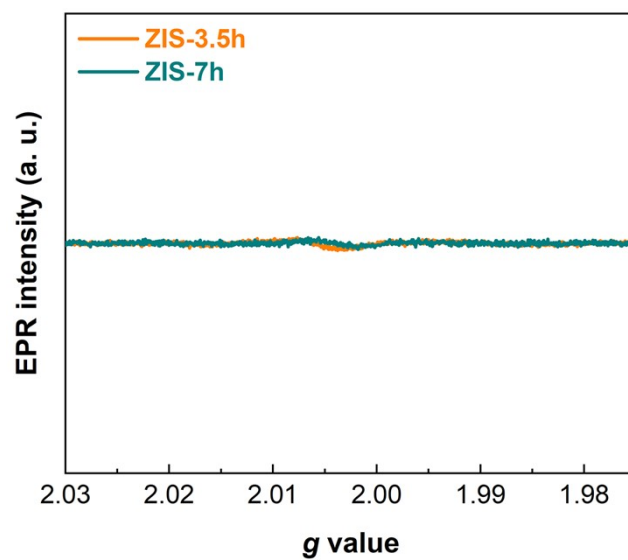

Fig. S3 EPR spectra of the ZIS-3.5h and ZIS-7h samples.

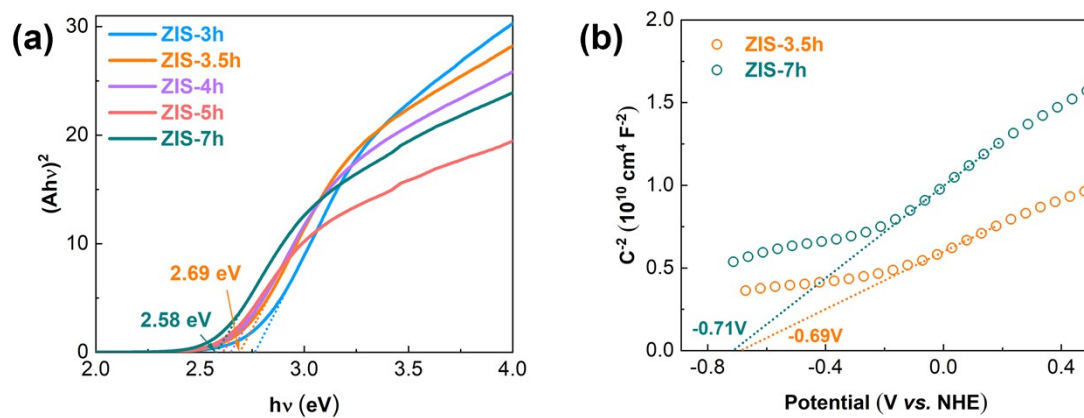

Fig. S4 (a) the Tauc plot and (b) Mott-Schottky plots of the as-prepared samples.

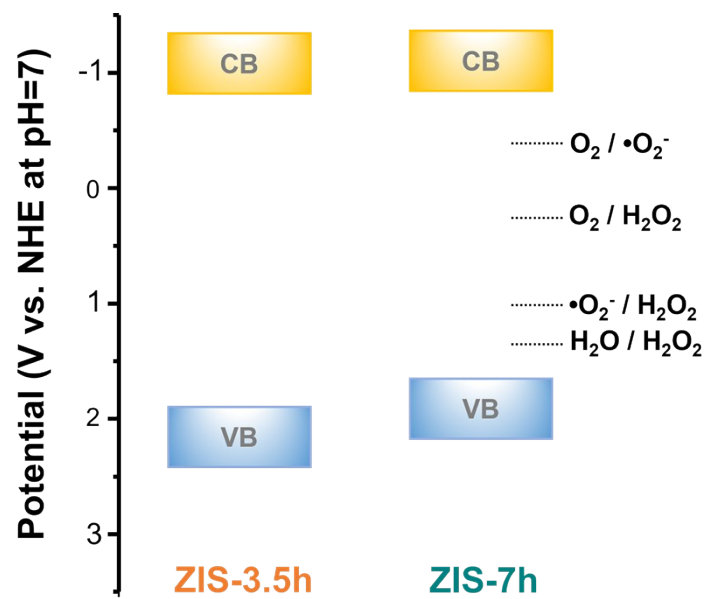

Fig. S5 Schematic illustration of band structure of the as-prepared samples.



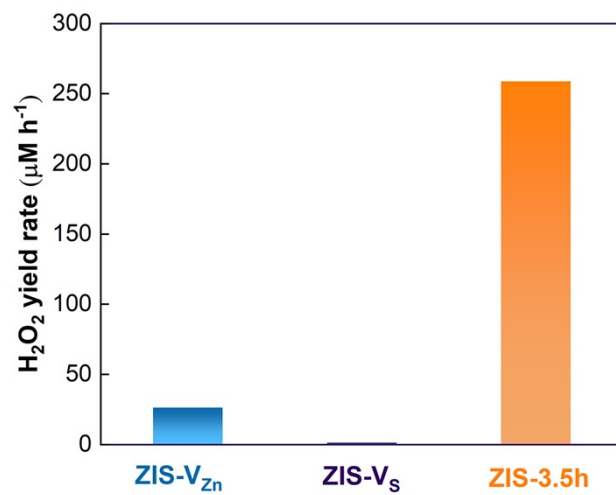

Fig. S6 Photocatalytic H<sub>2</sub>O<sub>2</sub> yield rate of different samples in O<sub>2</sub> - saturated pure water under AM1.5 irradiation.

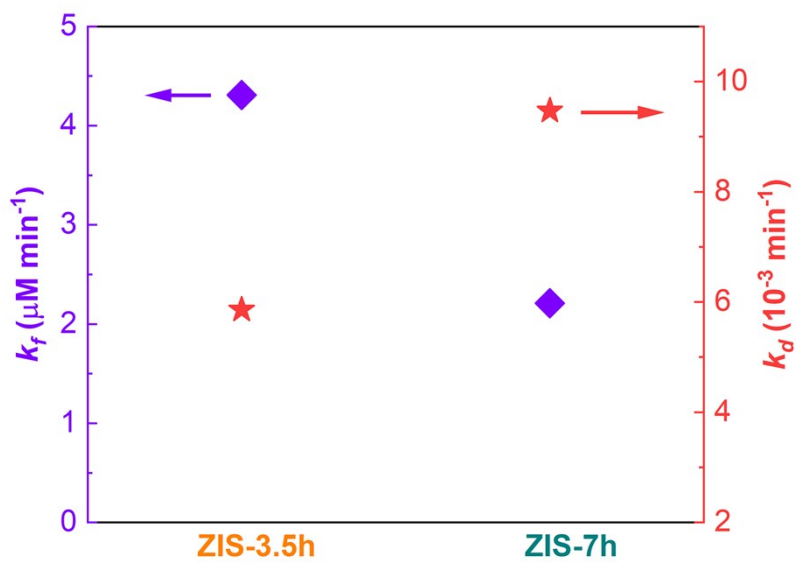

Fig. S7  $K_f$  and  $K_d$  constant of the ZIS-3.5h and ZIS-7h.

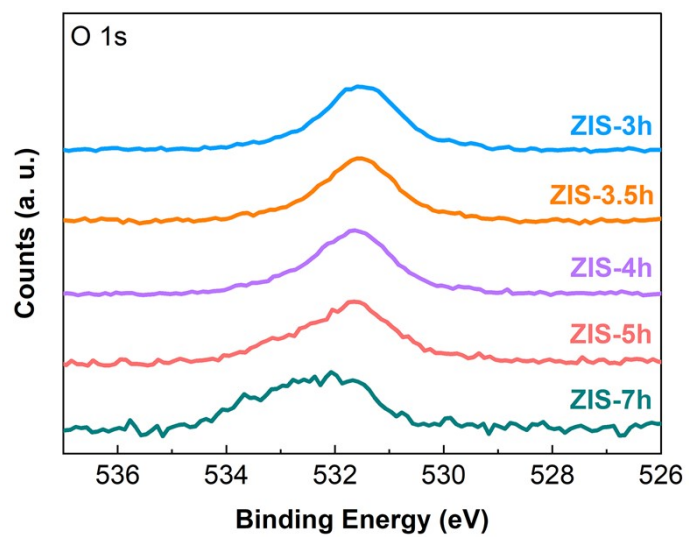

Fig. S8 The O 1s peaks of the as-prepared samples.

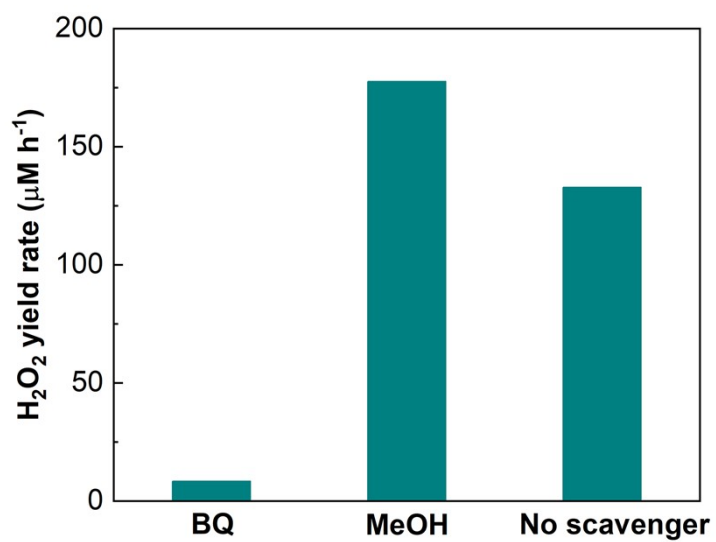

Fig. S9 Active species capture experiments over ZIS-7h under AM1.5 irradiation.

Table S1. The element atom contents measured by XPS.

| Samples  | Zn (at.%) | In (at.%) | S (at.%) | O (at.%) | C (at.%) | Zn : In : S : O atom ratio |
|----------|-----------|-----------|----------|----------|----------|----------------------------|
| ZIS-3h   | 5.11      | 21.14     | 23.10    | 23.75    | 26.90    | 0.48 : 2 : 2.18 : 2.25     |
| ZIS-3.5h | 8.66      | 20.93     | 25.87    | 20.61    | 23.93    | 0.82 : 2 : 2.47 : 1.97     |
| ZIS-4h   | 10.83     | 19.18     | 27.04    | 16.97    | 25.35    | 1.13 : 2 : 2.82 : 1.77     |
| ZIS-5h   | 16.18     | 18.50     | 30.27    | 11.55    | 23.49    | 1.75 : 2 : 3.27 : 1.25     |
| ZIS-7h   | 17.00     | 15.15     | 27.59    | 9.88     | 30.38    | 2.24 : 2 : 3.64 : 1.30     |

Table S2. The element atom contents measured by EDS

| Samples  | Zn (at.%) | In (at.%) | S (at.%) | Zn : In : S atom ratio |
|----------|-----------|-----------|----------|------------------------|
| ZIS-3.5h | 6.89      | 41.16     | 51.59    | 0.33 : 2 : 2.51        |
| ZIS-7h   | 13.15     | 29.77     | 57.08    | 0.88 : 2 : 3.83        |

Table S3. The inductively coupled plasma optical emission spectroscopy (ICP-OES) data of ZIS-3.5h.

| Samples  | Test elements | Sample element content W (%) | ICP normalization       |
|----------|---------------|------------------------------|-------------------------|
| ZIS-3.5h | Zn            | 5.41                         | $Zn_{0.34}In_2S_{2.46}$ |
|          | In            | 56.07                        |                         |
|          | S             | 19.27                        |                         |
| ZIS-7h   | Zn            | 14.13                        | $Zn_{1.01}In_2S_{4.36}$ |
|          | In            | 48.92                        |                         |
|          | S             | 29.79                        |                         |

Table S4. The element atom contents measured by organic element analyzer (OEA)

| Samples  | S (wt.%) | theoretical value of S (wt.%) | normalization      |
|----------|----------|-------------------------------|--------------------|
| ZIS-3.5h | 21.06    | 30.26                         | $Zn_xIn_yS_{2.78}$ |

Table S5 Summary of the H<sub>2</sub>O<sub>2</sub> yield rate of different photocatalysts

| Photocatalysts                                                                      | Light                                  | Dosage<br>(g L <sup>-1</sup> ) | Reaction<br>solution   | H <sub>2</sub> O <sub>2</sub> yield rate<br>(μM h <sup>-1</sup> ) | Ref.                 |
|-------------------------------------------------------------------------------------|----------------------------------------|--------------------------------|------------------------|-------------------------------------------------------------------|----------------------|
| g-C <sub>3</sub> N <sub>4</sub>                                                     | 300 W Xe lamp<br>λ > 420 nm            | 1                              | Pure water             | 54.87                                                             | 1                    |
| In <sub>2</sub> S <sub>3</sub> @O <sub>v</sub> / In <sub>2</sub> O <sub>3</sub>     | 300 W Xe lamp<br>λ > 420 nm            | 0.75                           | Pure water             | 206.45                                                            | 2                    |
| Au / BiVO <sub>4</sub>                                                              | 2000 W Xe lamp<br>λ > 420 nm           | 1.67                           | Pure water             | 4.2                                                               | 3                    |
| Polyimide / ZnIn <sub>2</sub> S <sub>4</sub>                                        | 300 W Xe lamp<br>λ > 420 nm            | 0.1                            | Pure water             | ~41.11                                                            | 4                    |
| Ni <sub>SAPs</sub> -PuCN                                                            | 300 W Xe lamp<br>λ ≥ 420 nm            | 1                              | Pure water             | 342.2                                                             | 5                    |
| cyclodextrin-<br>pyrimidine polymer                                                 | 300 W Xe lamp<br>λ ≥ 420 nm            | 0.25                           | Pure water             | 139.3                                                             | 6                    |
| CTF-BDDBN                                                                           | 300 W Xe lamp<br>λ > 420 nm            | 0.6                            | Pure water             | 58.33                                                             | 7                    |
| 10 % - Ti <sub>3</sub> C <sub>2</sub> / TiO <sub>2</sub>                            | UV light (λ = 365<br>nm)               | 1                              | Water /<br>ethanol     | 179.7                                                             | 8                    |
| Ag / ZnFe <sub>2</sub> O <sub>4</sub> -Ag-<br>Ag <sub>3</sub> PO <sub>4</sub> (111) | AM 1.5 G                               | 1                              | Water /<br>methanol    | 103.15                                                            | 9                    |
| EG-ZIS (ZnIn <sub>2</sub> S <sub>4</sub> )                                          | LED lamp<br>(100 mW cm <sup>-2</sup> ) | 0.4                            | Water /<br>isopropanol | 229.13                                                            | 10                   |
| <b>ZnIn<sub>2</sub>S<sub>4</sub> with dual<br/>vacancies</b>                        | <b>300 W Xe lamp<br/>λ ≥ 420 nm</b>    | <b>0.5</b>                     | <b>Pure water</b>      | <b>199.30</b>                                                     | <b>This<br/>work</b> |

Table S6. Summary of average electron lifetime deduced from the TRPL spectra

| Samples  | $\tau_1$ (ns) | $\tau_2$ (ns) | $A_1$   | $A_2$   | Average lifetime $\langle\tau\rangle$<br>(ns) | $\chi^2$ |
|----------|---------------|---------------|---------|---------|-----------------------------------------------|----------|
| ZIS-3.5h | 5.08          | 56.73         | 9640.18 | 1086.38 | 33.86                                         | 0.99     |
| ZIS-7h   | 6.03          | 60.16         | 9276.41 | 1247.71 | 37.04                                         | 0.99     |

The average lifetime is calculated by equation:

$$\langle\tau\rangle = \frac{A_1\tau_1^2 + A_2\tau_2^2}{A_1\tau_1 + A_2\tau_2}$$

$\chi^2$ : the goodness of fit parameter.

## References

1. S. Gou, C. Wang, Z. Gong, Q. Wang, X. Li, X. Chen, J. Wang, J. Ma and Y. Zhu, Three-dimensional charge carrier transport channel enhanced photocatalytic H<sub>2</sub>O<sub>2</sub> production in pure water over g-C<sub>3</sub>N<sub>4</sub>, *Sep. Purif. Technol.*, 2025, **354**, 128829.
2. X. Chen, W. Zhang, L. Zhang, L. Feng, C. Zhang, J. Jiang and H. Wang, Construction of Porous Tubular In<sub>2</sub>S<sub>3</sub>@In<sub>2</sub>O<sub>3</sub> with Plasma Treatment-Derived Oxygen Vacancies for Efficient Photocatalytic H<sub>2</sub>O<sub>2</sub> Production in Pure Water Via Two-Electron Reduction, *ACS Appl. Mater. Interfaces*, 2021, **13**, 25868-25878.
3. H. Hiraikawa, S. Shiota, Y. Shiraishi, H. Sakamoto, S. Ichikawa and T. Hirai, Au Nanoparticles Supported on BiVO<sub>4</sub>: Effective Inorganic Photocatalysts for H<sub>2</sub>O<sub>2</sub> Production from Water and O<sub>2</sub> under Visible Light, *ACS Catal.*, 2016, **6**, 4976-4982.
4. X. Liu, X. Dong, Y. Wang, J. Gao, N. Zheng and X. Zhang, Polyimide/ZnIn<sub>2</sub>S<sub>4</sub> heterostructures toward outstanding photocatalytic H<sub>2</sub>O<sub>2</sub> production from pure water and air, *Appl. Surf. Sci.*, 2024, **643**, 158637.
5. X. Zhang, H. Su, P. Cui, Y. Cao, Z. Teng, Q. Zhang, Y. Wang, Y. Feng, R. Feng, J. Hou, X. Zhou, P. Ma, H. Hu, K. Wang, C. Wang, L. Gan, Y. Zhao, Q. Liu, T. Zhang and K. Zheng, Developing Ni single-atom sites in carbon nitride for efficient

photocatalytic H<sub>2</sub>O<sub>2</sub> production, *Nat. Commun.*, 2023, **14**, 7115.

6. C. Chu, Q. Li, W. Miao, H. Qin, X. Liu, D. Yao and S. Mao, Photocatalytic H<sub>2</sub>O<sub>2</sub> production driven by cyclodextrin-pyrimidine polymer in a wide pH range without electron donor or oxygen aeration, *Appl. Catal. B: Environ.*, 2022, **314**, 121485.
7. L. Chen, L. Wang, Y. Wan, Y. Zhang, Z. Qi, X. Wu and H. Xu, Acetylene and diacetylene functionalized covalent triazine frameworks as metal-free photocatalysts for hydrogen peroxide production: a new two-electron water oxidation pathway, *Adv. Mater.*, 2020, **32**, 1904433.
8. Y. Chen, W. Gu, L. Tan, Z. Ao, T. An and S. Wang, Photocatalytic H<sub>2</sub>O<sub>2</sub> production using Ti<sub>3</sub>C<sub>2</sub> MXene as a non-noble metal cocatalyst, *Appl. Catal. A: Gen.*, 2021, **618**, 118127.
9. X. Ma and H. Cheng, Facet-dependent photocatalytic H<sub>2</sub>O<sub>2</sub> production of single phase Ag<sub>3</sub>PO<sub>4</sub> and Z-scheme Ag/ZnFe<sub>2</sub>O<sub>4</sub>-Ag-Ag<sub>3</sub>PO<sub>4</sub> composites, *Chem. Eng. J.*, 2022, **429**, 132373.
10. C. Ouyang, X. Quan, Z. A. Chen, K. Wang, X. Gu, Z. Hong and M. Zhi, Intercalation-and vacancy-enhanced internal electric fields in ZnIn<sub>2</sub>S<sub>4</sub> for highly efficient photocatalytic H<sub>2</sub>O<sub>2</sub> production, *J. Phys. Chem. C*, 2023, **127**, 20683-20699.
